# Supplementary material
Source: PubMed Central journal article supplement (PMC3223441)
Supplement: 1116737108_pnas.201116737SI.pdf [file 1116737108_pnas.201116737SI.pdf]

# Supporting Information

Strier et al. 10.1073/pnas.1116737108

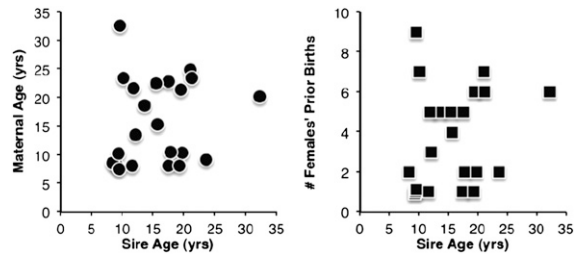

**Fig. S1.** Sire age vs. maternal age and reproductive history. Data are depicted at the time the offspring in this study were conceived. There was no relationship between sire age and either maternal age (Spearman's rank correlation  $\rho = 0.265$ ,  $n = 22$ ,  $P = 0.234$ ) or maternal fecundity (Spearman's rank correlation  $\rho = 0.310$ ,  $n = 22$ ,  $P = 0.161$ ).

A. Overview of the marker loci, primer concentrations, and thermal cycling profile used in each multiplex reaction.

| Primer Set  | Loci                   | Primer Concentrations ( $\mu\text{M}$ ) | Cycling Conditions |
|-------------|------------------------|-----------------------------------------|--------------------|
| Multiplex 1 | LL1118, D5S111, D8S260 | 0.10 - 0.10 - 0.10                      | PCR 1              |
| Multiplex 2 | SB38, LL1115, LL157    | 0.08 - 0.14 - 0.08                      | PCR 1              |
| Multiplex 3 | D8S165, LL113, LL1110  | 0.04 - 0.04 - 0.22                      | PCR 1              |
| Multiplex 4 | SB30, D17S804, LEON15  | 0.13 - 0.11 - 0.06                      | PCR 1              |
| Multiplex 5 | Lr.P2BH6, APM1, AB06   | 0.14 - 0.08 - 0.08                      | PCR 2              |
| Multiplex 6 | D13S160, LEON21        | 0.10 - 0.10                             | PCR 2              |

B. Detailed thermal cycling profiles used for multiplex PCR.

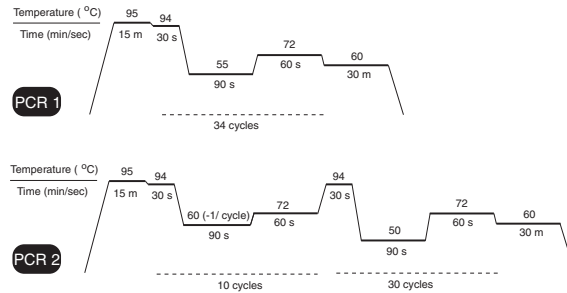

**Fig. S2.** Multiplex PCR combinations and PCR conditions used for genotyping. (A) Overview of the marker loci, primer concentrations, and thermal cycling profile used in each multiplex reaction. (B) Detailed thermal cycling profiles used for multiplex PCR.

**Table S1. Reproductive and residency histories of offsprings' mothers**

| Adult female ID | No. of offspring in sample | Reproductive history | Residency history           | No. of sons among the set of potential sires |
|-----------------|----------------------------|----------------------|-----------------------------|----------------------------------------------|
| BR              | 1                          | Multiparous          | Natal                       | 0                                            |
| DB              | 1                          | Nulliparous          | Natal                       | 0                                            |
| FE              | 2                          | Multiparous          | Immigrant                   | 0                                            |
| GA              | 1                          | Multiparous          | Immigrant                   | 1                                            |
| HE              | 1                          | Multiparous          | Immigrant                   | 2                                            |
| IZ              | 1                          | Multiparous          | Immigrant                   | 2                                            |
| JU              | 1                          | Multiparous          | Immigrant                   | 1                                            |
| KA              | 1                          | Multiparous          | Immigrant                   | 0                                            |
| KI-M2           | 1                          | Nulliparous          | Immigrant                   | 0                                            |
| MD-J            | 1                          | Nulliparous          | Immigrant                   | 0                                            |
| MY-M2           | 1                          | Nulliparous          | Immigrant                   | 0                                            |
| NY              | 1                          | Multiparous          | Present as adult since 1982 | 4                                            |
| PL              | 1                          | Multiparous          | Immigrant                   | 2                                            |
| SA              | 1                          | Primiparous          | Immigrant                   | 0                                            |
| TN-M2           | 1                          | Nulliparous          | Immigrant                   | 0                                            |
| TZ              | 1                          | Multiparous          | Immigrant                   | 3                                            |
| UR              | 1                          | Primiparous          | Immigrant                   | 0                                            |
| VD              | 1                          | Multiparous          | Immigrant                   | 0                                            |
| XI              | 1                          | Nulliparous          | Immigrant                   | 0                                            |
| YA              | 1                          | Primiparous          | Immigrant                   | 0                                            |
| ZU              | 1                          | Nulliparous          | Immigrant                   | 0                                            |

**Table S2. Potential sires' histories**

| Adult male ID | No. of offspring sired | Maximum no. of fertilizations | Maximum no. of fertilizations, excluding maternally related partners | Age (y) at first fertilization in this sample | Age (y) at last fertilization in this sample | No. of adult maternal brothers living | Male's mother living? | No. of adult maternal sisters resident |
|---------------|------------------------|-------------------------------|----------------------------------------------------------------------|-----------------------------------------------|----------------------------------------------|---------------------------------------|-----------------------|----------------------------------------|
| AG            | 0                      | 22                            | 22                                                                   | 12.90                                         | 15.36                                        | 1                                     | Yes                   | 0                                      |
| AM            | 1                      | 22                            | 22                                                                   | 19.57                                         | 22.04                                        | 1                                     | Yes                   | 0                                      |
| BE            | 4                      | 22                            | 21                                                                   | 15.37                                         | 17.84                                        | 0                                     | Yes                   | 2                                      |
| BLK           | 0                      | 22                            | 22                                                                   | 15.34                                         | 17.81                                        | 0                                     | No                    | 0                                      |
| CO            | 2                      | 22                            | 22                                                                   | 13.14                                         | 15.61                                        | 0                                     | No                    | 0                                      |
| DA            | 3                      | 22                            | 21                                                                   | 18.79                                         | 21.25                                        | 1                                     | Yes                   | 1                                      |
| DI            | 1                      | 22                            | 21                                                                   | 22.53                                         | 25.00                                        | 1                                     | Yes                   | 1                                      |
| GU            | 0                      | 22                            | 21                                                                   | 7.14                                          | 9.61                                         | 0                                     | Yes                   | 0                                      |
| HO            | 1                      | 22                            | 21                                                                   | 9.16                                          | 11.62                                        | 1                                     | Yes                   | 0                                      |
| HR            | 0                      | 10                            | 10                                                                   | 6.25*                                         | 8.72                                         | 1                                     | Yes                   | 0                                      |
| IJ            | 0                      | 3                             | 3                                                                    | 4.09*                                         | 6.56                                         | 1                                     | Yes                   | 0                                      |
| IN            | 0                      | 22                            | 21                                                                   | 10.03                                         | 12.50                                        | 1                                     | Yes                   | 0                                      |
| IV            | 1                      | 11                            | ?                                                                    | 32.23 <sup>†</sup>                            | Deceased                                     | ?                                     | ?                     | ?                                      |
| JR            | 0                      | 22                            | 21                                                                   | 12.96                                         | 15.43                                        | 0                                     | Yes                   | 0                                      |
| NE            | 1                      | 22                            | 21                                                                   | 17.12                                         | 19.59                                        | 3                                     | Yes                   | 0                                      |
| NI            | 0                      | 22                            | 21                                                                   | 22.54                                         | 25.00                                        | 3                                     | Yes                   | 0                                      |
| NO            | 1                      | 22                            | 21                                                                   | 11.25                                         | 13.72                                        | 3                                     | Yes                   | 0                                      |
| NR            | 2                      | 22                            | 21                                                                   | 8.18                                          | 10.64                                        | 3                                     | Yes                   | 0                                      |
| PB            | 0                      | 11                            | 10                                                                   | 5.19*                                         | 7.65                                         | 1                                     | Yes                   | 0                                      |
| PE            | 1                      | 22                            | 21                                                                   | 8.28                                          | 10.74                                        | 1                                     | Yes                   | 0                                      |
| RB            | 0                      | 22                            | 22                                                                   | 16.25                                         | 18.72                                        | 0                                     | No                    | 0                                      |
| TH            | 3                      | 22                            | 21                                                                   | 9.18                                          | 11.65                                        | 2                                     | Yes                   | 0                                      |
| TL            | 1                      | 22                            | 21                                                                   | 11.87                                         | 14.34                                        | 2                                     | Yes                   | 0                                      |
| TU            | 0                      | 12                            | 11                                                                   | 6.31*                                         | 8.78                                         | 2                                     | Yes                   | 0                                      |

\*Had not yet completed a copulation (see text) and were not included as possible sires in the paternity analysis until they were observed to do so.

<sup>†</sup>Present as an adult since 1982, thus age is estimated and maternal kin are unknown.

**Table S3. Genotypes and DNA template concentrations for each individual**

| ID   LOCI      | LL113   | LL1110  | LL1115  | LL1118  | LL157   | SB30    | SB38    | LEON15  | LEON21  | APM01   | AB06    | Lr-P2BH6 | D5S111  | D8S165  | D8S260  | D13S160 | D17S804 | DNA (ng/ $\mu$ L) |  |
|----------------|---------|---------|---------|---------|---------|---------|---------|---------|---------|---------|---------|----------|---------|---------|---------|---------|---------|-------------------|--|
| <b>Mothers</b> |         |         |         |         |         |         |         |         |         |         |         |          |         |         |         |         |         |                   |  |
| NY             | 183/183 | 220/223 | 200/200 | 138/160 | 224/232 | 97/103  | 126/128 | 263/263 | 367/379 | 200/204 | 271/273 | 102/112  | 164/168 | 137/137 | 205/205 | 243/243 | 154/160 | 0.96              |  |
| BR             | 179/180 | 212/221 | 200/200 | 142/145 | 224/224 | 97/97   | 128/132 | 263/265 | 367/379 | 204/210 | 267/271 | 98/112   | 174/174 | 141/141 | 201/211 | 239/245 | 154/162 | 0.36              |  |
| ZU             | 180/185 | 212/212 | 196/200 | 147/147 | 226/226 | 103/103 | 132/138 | 265/267 | 379/379 | 200/210 | 267/271 | 112/114  | 164/170 | 139/141 | 205/211 | 239/243 | 152/154 | 1.40              |  |
| YA             | 180/183 | 212/220 | 194/194 | 138/147 | 224/230 | 83/87   | 132/138 | 259/267 | 379/379 | 202/202 | 261/271 | 108/112  | 164/168 | 143/146 | 211/211 | 243/243 | 156/160 | 2.16              |  |
| KI             | 180/185 | 212/220 | 194/206 | 140/160 | 224/224 | 87/103  | 138/140 | 267/267 | 379/379 | 204/206 | 261/261 | 92/92    | 164/164 | 137/146 | 201/211 | 239/243 | 152/160 | 4.95              |  |
| MD             | 180/183 | 220/220 | 200/200 | 142/147 | 224/232 | 87/97   | 126/132 | 265/265 | 379/379 | 200/204 | 271/273 | 98/114   | 168/174 | 137/141 | 211/211 | 239/243 | 160/160 | 2.25              |  |
| MY             | 180/183 | 212/220 | 200/206 | 142/147 | 224/230 | 101/103 | 132/144 | 265/267 | 367/379 | 202/206 | 271/273 | 98/108   | 164/168 | 137/137 | 205/205 | 243/243 | 152/154 | 2.43              |  |
| SA             | 179/185 | 212/212 | 200/200 | 142/147 | 226/226 | 87/87   | 126/132 | 259/267 | 379/379 | 200/210 | 271/273 | 112/112  | 162/170 | 139/141 | 205/211 | 243/243 | 160/160 | 1.92              |  |
| TN             | 183/185 | 220/221 | 200/200 | 140/142 | 224/230 | 83/103  | 132/136 | 263/269 | 379/379 | 200/210 | 267/271 | 106/112  | 164/164 | 137/143 | 205/211 | 243/243 | 160/160 | 2.25              |  |
| UR             | 180/185 | 212/212 | 194/200 | 142/147 | 226/226 | 97/103  | 126/132 | 265/265 | 379/379 | 200/200 | 271/273 | 112/112  | 162/174 | 141/141 | 211/211 | 239/243 | 154/156 | 1.37              |  |
| VD             | 179/183 | 218/221 | 194/200 | 138/147 | 226/232 | 87/103  | 126/132 | 259/263 | 379/379 | 206/210 | 271/273 | 110/112  | 164/170 | 141/143 | 211/211 | 239/243 | 154/160 | 2.21              |  |
| XI             | 179/185 | 220/221 | 206/206 | 158/160 | 224/224 | 83/103  | 132/144 | 263/269 | 379/379 | 200/202 | 271/273 | 112/114  | 162/170 | 139/143 | 205/205 | 243/243 | 156/160 | 2.14              |  |
| FE             | 180/183 | 220/221 | 194/200 | 138/142 | 224/230 | 103/103 | 132/132 | 259/265 | 375/379 | 200/204 | 261/271 | 102/112  | 164/168 | 137/139 | 211/211 | 243/247 | 154/154 | 1.56              |  |
| IZ             | 183/185 | 212/218 | 200/200 | 142/158 | 226/232 | 87/97   | 138/144 | 263/265 | 379/379 | 200/204 | 267/273 | 98/112   | 162/162 | 137/141 | 201/211 | 243/245 | 154/162 | 1.17              |  |
| JU             | 180/183 | 212/220 | 194/200 | 142/147 | 226/230 | 83/97   | 132/132 | 259/263 | 375/379 | 200/210 | 271/271 | 112/112  | 162/170 | 137/139 | 205/211 | 247/247 | 154/160 | 0.74              |  |
| HE             | 183/185 | 218/220 | 200/200 | 142/142 | 224/226 | 97/101  | 132/144 | 263/265 | 367/379 | 200/200 | 271/273 | 112/112  | 162/174 | 137/139 | 205/211 | 239/243 | 154/160 | 0.93              |  |
| TZ             | 183/183 | 212/218 | 196/200 | 142/147 | 224/226 | 97/103  | 126/136 | 259/265 | 375/379 | 200/210 | 267/273 | 92/112   | 162/170 | 141/146 | 211/211 | 239/243 | 154/160 | 0.85              |  |
| KA             | 180/180 | 212/212 | 194/200 | 142/142 | 226/226 | 87/87   | 132/144 | 265/267 | 379/379 | 200/200 | 271/273 | 108/112  | 164/170 | 137/137 | 211/211 | 243/243 | 154/160 | 1.30              |  |
| PL             | 180/185 | 218/220 | 194/200 | 142/147 | 224/226 | 103/103 | 132/132 | 259/265 | 367/379 | 200/202 | 271/271 | 112/112  | 162/170 | 137/137 | 205/211 | 239/247 | 154/156 | 0.46              |  |
| <b>Infants</b> |         |         |         |         |         |         |         |         |         |         |         |          |         |         |         |         |         |                   |  |
| BM             | 179/180 | 218/221 | 200/200 | 142/142 | 224/224 | 87/97   | 132/138 | 263/267 | 367/379 | 204/210 | 267/271 | 112/112  | 162/174 | 137/141 | 211/211 | 239/245 | 152/162 | 2.53              |  |
| HG             | 183/183 | 218/220 | 200/200 | 142/158 | 226/232 | 97/101  | 128/132 | 263/265 | 379/379 | 200/200 | 271/271 | 92/112   | 168/174 | 137/139 | 205/211 | 243/243 | 154/160 | 2.76              |  |
| JB             | 180/183 | 212/221 | 200/200 | 142/147 | 226/230 | 83/103  | 132/132 | 259/265 | 375/375 | 200/210 | 271/271 | 112/112  | 162/164 | 137/141 | 211/211 | 247/247 | 156/160 | 1.40              |  |
| KPA            | 180/180 | 212/220 | 194/194 | 142/142 | 224/226 | 87/97   | 132/132 | 265/267 | 379/379 | 200/210 | 271/271 | 112/112  | 164/164 | 137/141 | 211/211 | 229/243 | 156/160 | 1.62              |  |
| NV             | 183/183 | 212/220 | 200/200 | 142/160 | 224/232 | 103/103 | 126/126 | 259/263 | 379/379 | 200/200 | 273/273 | 106/112  | 164/170 | 137/137 | 205/205 | 243/243 | 154/160 | 2.33              |  |
| PTN            | 183/185 | 218/220 | 194/200 | 142/142 | 226/230 | 97/103  | 132/136 | 259/267 | 379/379 | 200/202 | 267/271 | 112/112  | 162/164 | 137/139 | 211/211 | 239/243 | 154/156 | 2.85              |  |
| TCA            | 180/183 | 218/221 | 196/200 | 142/147 | 224/224 | 103/103 | 132/136 | 265/265 | 379/379 | 204/210 | 267/271 | 112/112  | 170/170 | 141/146 | 211/211 | 229/239 | 154/160 | 1.77              |  |
| FRD            | 179/180 | 212/220 | 194/200 | 138/142 | 224/226 | 87/103  | 132/144 | 259/267 | 367/375 | 200/204 | 271/273 | 102/112  | 168/168 | 139/146 | 211/211 | 243/247 | 154/160 | 1.15              |  |
| IC             | 183/185 | 218/221 | 200/200 | 142/142 | 226/232 | 87/87   | 128/144 | 265/267 | 367/379 | 204/204 | 267/273 | 112/112  | 162/164 | 137/141 | 211/211 | 245/245 | 154/160 | 3.99              |  |
| KNA            | 183/185 | 220/221 | 194/200 | 140/142 | 224/224 | 87/103  | 132/138 | 263/267 | 379/379 | 206/206 | 261/271 | 92/106   | 164/170 | 141/146 | 211/211 | 239/243 | 152/154 | 2.84              |  |
| MEL            | 180/183 | 212/220 | 200/200 | 138/147 | 232/232 | 97/101  | 132/136 | 265/265 | 375/379 | 200/204 | 267/271 | 98/112   | 168/174 | 137/141 | 205/211 | 243/243 | 154/160 | 2.83              |  |
| MTR            | 180/183 | 220/221 | 200/200 | 138/142 | 224/224 | 97/101  | 144/144 | 259/267 | 379/379 | 200/202 | 273/273 | 98/112   | 164/164 | 131/137 | 205/205 | 243/247 | 152/160 | 3.02              |  |
| XHI            | 180/185 | 212/220 | 194/206 | 158/160 | 224/226 | 83/103  | 132/132 | 259/263 | 379/379 | 200/202 | 267/273 | 98/112   | 164/170 | 137/146 | 211/211 | 239/243 | 152/160 | 4.12              |  |
| YY             | 180/183 | 220/220 | 194/206 | 138/142 | 224/230 | 83/97   | 138/140 | 259/259 | 379/379 | 202/210 | 261/261 | 108/112  | 164/168 | 143/143 | 211/211 | 243/243 | 156/160 | 1.71              |  |
| DN             | 183/183 | 220/221 | 200/200 | 142/160 | 224/224 | 101/103 | 126/136 | 263/263 | 379/379 | 206/210 | 267/273 | 106/112  | 164/170 | 141/143 | 211/211 | 243/243 | 154/160 | 3.03              |  |
| FELC           | 179/180 | 212/221 | 194/200 | 138/142 | 224/230 | 87/103  | 132/144 | 259/265 | 375/379 | 200/204 | 271/273 | 102/112  | 164/164 | 137/141 | 205/211 | 243/243 | 154/154 | 1.31              |  |
| GH             | 183/183 | 212/220 | 200/200 | 142/147 | 230/232 | 103/103 | 136/144 | 263/267 | 375/379 | 202/202 | 271/273 | 112/114  | 164/170 | 139/139 | 205/211 | 243/243 | 154/160 | 2.85              |  |
| SF             | 179/183 | 212/223 | 200/200 | 147/160 | 226/230 | 87/101  | 132/136 | 263/267 | 367/379 | 204/210 | 267/271 | 112/112  | 168/170 | 137/139 | 205/205 | 243/243 | 154/160 | 4.12              |  |
| US             | 180/180 | 212/212 | 200/200 | 142/158 | 226/232 | 97/103  | 132/132 | 265/265 | 379/379 | 200/210 | 271/271 | 102/112  | 162/164 | 139/141 | 205/211 | 243/247 | 156/160 | 3.96              |  |
| VG             | 179/180 | 212/221 | 200/200 | 147/160 | 226/226 | 97/103  | 126/132 | 263/265 | 367/375 | 202/210 | 271/273 | 110/112  | 162/164 | 137/141 | 211/211 | 243/243 | 154/154 | 1.84              |  |
| TRN            | 183/185 | 220/221 | 200/200 | 140/142 | 230/230 | 97/103  | 132/136 | 263/267 | 379/379 | 202/210 | 267/271 | 112/112  | 164/164 | 131/137 | 205/211 | 243/243 | 154/160 | 3.90              |  |
| ZMA            | 183/185 | 212/220 | 196/200 | 142/147 | 226/226 | 103/103 | 132/136 | 259/267 | 379/379 | 200/200 | 267/271 | 112/112  | 164/164 | 139/141 | 205/211 | 243/243 | 152/160 | 0.36              |  |



**Table S4. Summary statistics for the 17 microsatellite marker loci used in this study**

| Locus           | Alleles | HObs | HExp | PIC  | F(Null) | H-W | Reference |
|-----------------|---------|------|------|------|---------|-----|-----------|
| <i>LL113</i>    | 4       | 0.76 | 0.72 | 0.66 | -0.03   | NS  | (1)       |
| <i>LL1110</i>   | 6       | 0.79 | 0.74 | 0.69 | -0.04   | NS  | (1)       |
| <i>LL1115</i>   | 4       | 0.39 | 0.43 | 0.40 | 0.05*   | ND  | (1)       |
| <i>LL1118</i>   | 7       | 0.72 | 0.69 | 0.66 | -0.01   | NS  | (1)       |
| <i>LL157</i>    | 4       | 0.66 | 0.70 | 0.64 | 0.03*   | NS  | (1)       |
| <i>SB30</i>     | 5       | 0.76 | 0.73 | 0.68 | -0.02   | NS  | (2)       |
| <i>SB38</i>     | 7       | 0.79 | 0.78 | 0.75 | -0.02   | NS  | (2)       |
| <i>LEON15</i>   | 5       | 0.76 | 0.75 | 0.70 | -0.01   | NS  | (3)       |
| <i>LEON21</i>   | 3       | 0.43 | 0.46 | 0.41 | 0.04*   | NS  | (3)       |
| <i>APM01</i>    | 5       | 0.79 | 0.77 | 0.72 | -0.02   | NS  | (4)       |
| <i>AB06</i>     | 4       | 0.76 | 0.70 | 0.63 | -0.06   | NS  | (5)       |
| <i>Lr.P2BH6</i> | 8       | 0.58 | 0.55 | 0.53 | -0.04   | NS  | (6)       |
| <i>D5S111</i>   | 5       | 0.69 | 0.73 | 0.69 | 0.04*   | NS  | (7)       |
| <i>D8S165</i>   | 7       | 0.79 | 0.78 | 0.74 | -0.01   | NS  | (8)       |
| <i>D8S260</i>   | 3       | 0.46 | 0.51 | 0.42 | 0.05*   | NS  | (9)       |
| <i>D13S160</i>  | 5       | 0.60 | 0.59 | 0.55 | -0.01   | NS  | (9)       |
| <i>D17S804</i>  | 5       | 0.79 | 0.69 | 0.63 | -0.08   | NS  | (9)       |
| Mean            | 5       | 0.68 | 0.67 | 0.62 | -0.01   | —   | —         |

HExp, expected heterozygosity; HObs, observed heterozygosity; H-W, Hardy-Weinberg equilibrium test (ND, not done; NS, not significant; some genotype frequencies are lower than 5%); F(Null): estimated frequency of null alleles (\*indicates a positive and significant estimated frequency of null alleles); PIC, polymorphic information content.

- Di Fiore A, Fleischer RC (2004) Microsatellite markers for woolly monkeys (*Lagothrix lagotricha*) and their amplification in other New World primates (Primates: Platyrrhini). *Mol Ecol Notes* 4:246–249.
- Bohle UR, Zischler H (2002) Polymorphic microsatellite loci for the mustached tamarin (*Saguinus mystax*) and their cross-species amplification in other New World monkeys. *Mol Ecol Notes* 2:1–3.
- Perez-Sweeney BM, et al. (2005) Dinucleotide microsatellite primers designed for a critically endangered primate, the black lion tamarin (*Leontopithecus chrysopygus*). *Mol Ecol Notes* 5:198–201.
- Cortés-Ortiz L, Mondragón E, Cabotage J (2010) Isolation and characterization of microsatellite loci for the study of Mexican howler monkeys, their natural hybrids, and other Neotropical primates. *Conserv Genetics Resources* 2:21–26.
- Goncalves EC, Silva A, Barbosa MSR, Schneider MPC (2004) Isolation and characterization of microsatellite loci in Amazonian red-handed howlers *Alouatta belzebul* (Primates, Platyrrhini). *Mol Ecol Notes* 4:406–408.
- Grativol AD, Ballou JD, Fleischer RC (2001) Microsatellite variation within and among recently fragmented populations of the golden lion tamarin (*Leontopithecus rosalia*). *Conserv Genet* 2:1–9.
- Weber JL, Kwitek AE, May PE (1990) Dinucleotide repeat polymorphisms at the D5S107, D5S108, D5S111, D5S117 and D5S118 loci. *Nucleic Acids Res* 18:4035.
- Weber JL, May PE (1989) Abundant class of human DNA polymorphisms which can be typed using the polymerase chain reaction. *Am J Hum Genet* 44:388–396.
- Weissenbach J, et al. (1992) A second-generation linkage map of the human genome. *Nature* 359:794–801.

**Table S5. Paternities assigned at  $\geq 99\%$  confidence based on 17- and 12-locus genotype datasets**

| Offspring ID (from oldest to youngest) | Most likely sire | 17 loci                                      | 12 loci*                                     |
|----------------------------------------|------------------|----------------------------------------------|----------------------------------------------|
|                                        |                  | No. of mismatches with next most likely sire | No. of mismatches with next most likely sire |
| DN                                     | TH               | 3                                            | 1                                            |
| FELC                                   | IV               | 2                                            | 1 <sup>†</sup>                               |
| GH                                     | BE               | 2                                            | 1                                            |
| HG                                     | NO               | 5                                            | 3                                            |
| IC                                     | CO               | 4                                            | 3                                            |
| NV                                     | TH               | 4                                            | 3                                            |
| SF                                     | NR               | 4                                            | 2                                            |
| US                                     | AM               | 5                                            | 3                                            |
| VG                                     | TL               | 4                                            | 2                                            |
| BM                                     | HO               | 4                                            | 4                                            |
| JB                                     | DA               | 2                                            | 1                                            |
| MEL                                    | NR               | 5                                            | 3                                            |
| XHI                                    | PE               | 3                                            | 2 <sup>‡</sup>                               |
| YY                                     | DI               | 3                                            | 1                                            |
| FRD                                    | CO               | 5                                            | 2                                            |
| KNA                                    | TH               | 4                                            | 3                                            |
| KPA                                    | DA               | 2                                            | 1                                            |
| MTR                                    | NE               | 2                                            | 2                                            |
| PTN                                    | BE               | 3                                            | 2                                            |
| TCA                                    | DA               | 3                                            | 1                                            |
| TRN                                    | BE               | 4                                            | 2                                            |
| ZMA                                    | BE               | 2                                            | 2                                            |

\*Excludes the five loci with a positive estimated frequency of null alleles (Table S4): *LL1115*, *LL157*, *LEON21*, *D5S111*, and *D8S260*.

<sup>†</sup>In the analysis excluding two additional loci, *LL1110* and *1113*, a different male (IJ) was assigned paternity at the  $\geq 95\%$  confidence level, with male IV identified as the second most-likely sire. The genotypes of both IV and IJ were perfectly compatible with that of FELC, and the change in assignment in the 10-locus analysis is almost certainly because of discarding valuable information from seven variable loci. In all of the larger datasets, male IJ mismatches from that of FELC at  $\geq 1$  locus. Additionally, the young age of male IJ at the time of FELC's conception (which occurred before the onset of IJ's sexual activity) also argues strongly against the possibility that he could have been the sire.

<sup>‡</sup>In the analysis excluding two additional loci, *LL1110* and *LL113*, confidence in this assignment dropped to the  $\geq 95\%$  level.

**Table S6. Results of the DADSHARE analysis examining which potential sires could have shared a father**

| Male IDs* | Possible paternal sibling set <sup>†</sup> | Maternal genotype included? <sup>‡</sup> | Age difference from closest younger potential male paternal sibling <sup>§</sup> |
|-----------|--------------------------------------------|------------------------------------------|----------------------------------------------------------------------------------|
| IJ        | A                                          | Yes                                      | NA                                                                               |
| PB        | B                                          | Yes                                      | NA                                                                               |
| HR        | A                                          | Yes                                      | 2.16                                                                             |
| TU        | C                                          | Yes                                      | NA                                                                               |
| GU        | D                                          | Yes                                      | NA                                                                               |
| NR        | E                                          | Yes                                      | NA                                                                               |
| PE        | F                                          | Yes                                      | NA                                                                               |
| HO        | G                                          | Yes                                      | NA                                                                               |
| TH        | C                                          | Yes                                      | 2.87                                                                             |
| IN        | A                                          | Yes                                      | 3.78                                                                             |
| NO        | G                                          | Yes                                      | 2.09                                                                             |
| TL        | E                                          | Yes                                      | 3.69                                                                             |
| AG        | E                                          | No                                       | <b><u>1.03</u></b>                                                               |
| JR        | D                                          | Yes                                      | <b><u>5.82</u></b>                                                               |
| CO        | A                                          | No                                       | 3.11                                                                             |
| BLK       | H                                          | No                                       | NA                                                                               |
| BE        | H                                          | No                                       | <b><u>0.03</u></b>                                                               |
| RB        | C                                          | No                                       | <b><u>7.07</u></b>                                                               |
| NE        | A                                          | Yes                                      | 3.98                                                                             |
| DA        | A                                          | No                                       | <b><u>1.67</u></b>                                                               |
| AM        | I                                          | No                                       | NA                                                                               |
| DI        | D                                          | No                                       | 9.57                                                                             |
| NI        | B                                          | Yes                                      | 17.35                                                                            |
| IV        | A                                          | No                                       | 13.44                                                                            |

\*Adult males, listed from youngest to oldest, taken from the list of potential sires for the present study (Table S2).

<sup>†</sup>The potential paternal sibling set indicates those groups of males, indicated by the same letters, that DADSHARE identified as having the possibility of having been sired by the same father, given the potential sires' genotypes and the genotype of their mothers.

<sup>‡</sup>Maternal genotypes were included only if the males' mothers were among the set of females whose genotypes were known from the paternity study (i.e., those females who contributed offspring to the 2005–2007 infant cohorts).

<sup>§</sup>Closest difference in age (older minus younger) between adult males that DADSHARE identified as possibly sharing a father. NA indicates that no younger male with the same potential father exists in the dataset. There were only three cases (boldfaced and underlined) where the age difference between males who could have had the same father is <2 y, as described in the text. Male relative ages are as shown in Table S2.
